## Gamma oscillations coordinate different theta rhythms in the hippocampus

Víctor J. Lopez-Madrona<sup>1</sup>, Efrén Álvarez-Salvado<sup>1</sup>, David Moratal<sup>2</sup>, Oscar Herreras<sup>3</sup>,  
Ernesto Pereda<sup>4,5</sup>, Claudio R. Mirasso<sup>6</sup>, Santiago Canals<sup>1</sup>

<sup>1</sup> Instituto de Neurociencias, Consejo Superior de Investigaciones Científicas, Universidad Miguel Hernández, San Juan de Alicante 03550, Spain

<sup>2</sup> Centro de Biomateriales e Ingeniería Tisular, Universitat Politècnica de València, Valencia 46022, Spain

<sup>3</sup> Instituto Cajal, Consejo Superior de Investigaciones Científicas, Madrid 28002, Spain

<sup>4</sup> Departamento de Ingeniería Industrial & IUNE, Escuela Superior de Ingeniería y Tecnología, Universidad de La Laguna, La Laguna, Tenerife 38205, Spain

<sup>5</sup> Laboratory of Cognitive and Computational Neuroscience, Center for Biomedical Technology, Madrid, Spain

<sup>6</sup> Instituto de Física Interdisciplinar y Sistemas Complejos, IFISC (CSIC-UIB), Campus Universitat de les Illes Balears, Palma de Mallorca 07122, Spain

**Corresponding Author:** Santiago Canals (scanals@umh.es)

## Summary

Theta-gamma cross-frequency coupling (CFC) is thought to route information flow in the brain. How this idea copes with the co-existence of multiple theta rhythm generators is not well understood. We have analysed multiple theta and gamma activities in the hippocampus to unveil the dynamic synchronization of theta oscillations across hippocampal layers, and its differential coupling to layer-specific gamma frequency bands. We found that theta-gamma CFC is stronger between oscillations originated in the same hippocampal layer. Interestingly, strong CFC was linked to theta phase locking across layers in a behaviourally related manner, being higher during memory retrieval and encoding. Systematic analysis of cross-frequency directionality indicated that the amplitude of gamma oscillations sets the phase of theta in all layer-specific theta-gamma pairs. These results suggest, contrary to an extended assumption, that layer- and band-specific gamma-oscillations coordinate theta rhythms. This mechanism may explain how anatomically distributed computations, organized in theta waves, can be bound together.

Keywords: hippocampus, theta, gamma, cross-frequency coupling, novelty, synchronization, information transmission

## Introduction

Brain oscillations of different frequencies are thought to reflect a multi-scale organization in which information can be bound or segregated in oscillatory cycles<sup>1-3</sup>. Interactions between different oscillations, known as cross-frequency coupling (CFC)<sup>4-6</sup>, have been measured in multiple brain regions during perception<sup>7-9</sup>, attention<sup>10,11</sup> and memory formation<sup>7,12-15</sup>. It is believed that these interactions play a role in the coordination of local computations and large-scale network communication<sup>1-3,16-18</sup>. In the hippocampus, theta and gamma oscillations are the most prominent rhythms recorded in freely moving animals<sup>19,20</sup>, and it has been proposed that information transmission between the CA1 region and its afferent regions in CA3 and the entorhinal cortex (EC) is organized in separated gamma frequency channels that are synchronized by the phase of the slower CA1 theta rhythm<sup>18</sup>. The output activity from CA1 has been shown to organize in yet another separated gamma band specifically overlapping the pyramidal cell layer<sup>21,22</sup> and the coupling of the three layer-specific gamma oscillations to the underlying theta rhythm was shown to depend on the behavioural state<sup>21-24</sup>. However, theta oscillations originating in different anatomical layers are also known to coexist in the hippocampus<sup>19,20,25-31</sup>, and therefore theta-gamma interactions need to be understood in the context of multiple rhythm generators.

In addition to the classical medial septum/diagonal band of Broca input imposing a global rhythmicity to the hippocampus and EC, important rhythm generators are located in EC layers II (EC2) and III (EC3), whose activity reach the DG and hippocampus proper through the perforant and temporoammonic pathways respectively, and from CA3 activity reaching CA1 *stratum radiatum* through the Schafer collaterals<sup>19</sup>. Importantly, although theta oscillation in the hippocampus are most commonly studied as a unique coherent oscillation across hippocampal layers, exhibiting a characteristic amplitude/phase vs. depth variation<sup>19</sup>, the frequency and phase of the CA3 theta rhythm generator was shown to change relatively independently from the EC theta inputs<sup>32</sup>. How these multiple theta rhythm generators and layer-specific gamma oscillations interact in the hippocampus is not well understood. One intriguing possibility is that theta and gamma activities of different laminar origin may represent independent communication channels with possibility to coordinate distributed processes.

Here we investigated the function of layer-specific synchronization of oscillatory activity in the hippocampus of rats freely exploring known and novel environments and

resolving a T-maze. Using high density electrophysiological recordings aided by source separation techniques we characterized the dynamic properties of three different theta and three different gamma dipoles in the hippocampus with origins in the CA3 Schaffer collateral layer, the EC3 projection to the *stratum lacunosum-moleculare* and EC2 projection to the mid-molecular layer of the DG, respectively, and found strong support for the existence of relatively independent theta-gamma frameworks. We further characterized theta-gamma interactions between the different layers and established an association with the synchronization state in the hippocampal network. Finally, we investigated the functional role of the characterized theta-gamma coordinated time frames for contextual learning.

## Results

### Layer-specific theta and gamma oscillations

We performed electrophysiological recordings using linear array electrodes across the dorsal hippocampus in five rats (see Supplementary Methods, Figure 1). Recordings were carried out while the animal explored an open field or a T-maze. Using spatial discrimination techniques to separate LFP sources contributed by different synaptic pathways, based on independent component analysis (ICA)<sup>33–37</sup>, we dissected 3 robust components in all subjects (Figure 1; Supplementary Methods). The maximum voltages (Figure 1b) and dipoles in the current source density (CSD) depth profiles (Figure 1c) of the three components matched the stratified distribution of known terminal fields in the hippocampus, and the currents resulting from stimulation of the corresponding pathways, as previously shown<sup>21,22,35,36</sup>. The first component was located in the *stratum radiatum*, where the CA3 Schaffer collateral/commissural pathway targets the CA1 region (labelled as Schaffer component or Sch-IC). The second matched the EC3 projection in the *stratum lacunosum-moleculare* (Im-IC), and the third one the perforant pathway from EC2 to the mid-molecular layer of the DG (PP-IC). These three components, referred to as layer-specific LFPs or IC-LFPs, represent the synaptic contributions with distinct anatomical origins recorded in the LFP<sup>37</sup>.

The power spectra of these signals exhibited a clear peak at theta frequency (6-8 Hz) and prominent broadband gamma activity (Figure 1e). The dominant theta current sinks and sources calculated from the three layer-specific LFPs (Figure 1f) showed phase differences consistent with the firing properties of principal neurons in their respective upstream afferent layers<sup>38</sup>. Entorhinal principal cells in EC2 and EC3 have been shown to fire in anti-phase,

relative to the theta oscillation and, accordingly, theta current sinks (Figure 1f) and large amplitude gamma oscillations (Figure 1g) in PP-IC and Im-IC were shifted 180°. CA3 and EC3 neurons have been previously shown to fire phase locked to discrete gamma band oscillations in the downstream Sch-IC and Im-IC, respectively<sup>21,39</sup>, with gamma oscillations segregated in the phases of the slower theta wave recorded in CA1<sup>18,21,22</sup>. In good agreement, layer-specific gamma oscillations were segregated in the theta cycle, with Im-IC close to the theta peak and followed by Sch-IC in the descending phase to trough of the cycle and PP-IC in the transition from the trough to the ascending phase of the theta cycle (Figure 1g). Overall, these results support the use of multichannel recordings and source separation tools to investigate interactions between theta and gamma current generators in multiple layers of the hippocampal formation.

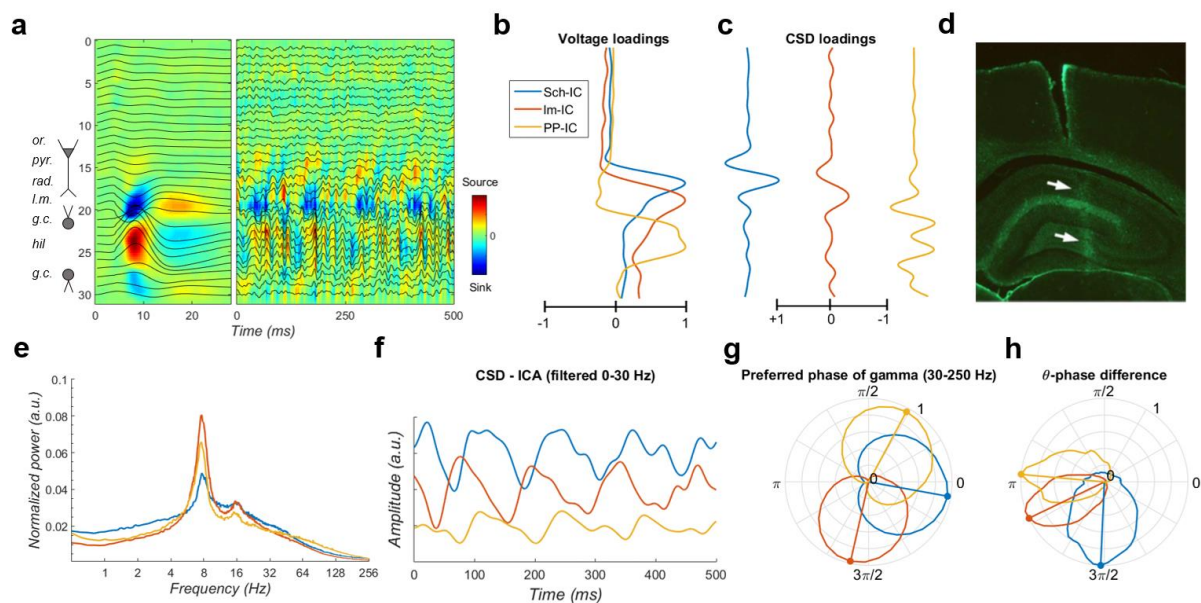

### Figure 1. Layer-specific local field potentials (LFPs).

(a) Depth profiles of the electrophysiological signals recorded in the dorsal hippocampus (32 recordings, sites spaced every 100  $\mu\text{m}$ ) evoked by an electric pulse stimulating the perforant pathway (left panel) or during resting activity (right panel). Black traces represent the LFPs and color maps the corresponding current source density (CSD). Evoked activity was used to consistently localize the electrodes during implantation. Or, *stratum oriens*; pyr, pyramidal layer; rad, *stratum radiatum*; lm, *stratum lacunosum-moleculare*; gc, granule cell layer; hil, hilus.

(b and c) Voltage- and CSD-loadings of the three layer-specific LFPs extracted with the ICA, with maximum loadings overlapping the corresponding afferent layers in the *str. radiatum* (Sch-IC), *lacunosum-moleculare* (Im-IC) and the molecular layer of the dentate gyrus (PP-IC).

(d) Position of the recording electrode in one representative animal (arrows). The histological section is immunostained with GFAP antibodies.

(e) Power spectrums of the three ICs show a clear peak at the theta frequency and a broadband gamma activity.

(f) Representative low-pass filtered CSD traces of each IC.

(g) Broadband gamma activity of each IC along the theta cycle recorded in the CA1 pyramidal layer.

(h) Histogram of the delay difference between the theta rhythms of the ICs and the LFP from CA1 pyramidal cell layer. The trough and the peak of the cycle have a value of 0 and  $\pi$  radians respectively. Distribution have their maximum at the preferred delay between theta oscillations (marked with dots), and their width reflect the wide variability in delays across cycles.

### **Different theta frameworks coexist in the dorsal hippocampus**

The frequency and phase of the CA3 theta rhythm generator has been shown to change relatively independently from the EC theta inputs<sup>32</sup>. However, theta oscillations in the hippocampus are commonly viewed as a unique coherent oscillation. Taking advantage of the separation of theta activity in layer-specific theta oscillations (Figure 1), we now investigated their interaction across layers (Figure 2a). To this end we computed a synchronization index (SI) measuring the delay difference between two consecutive theta cycles, normalized to the maximal phase difference found in the complete time series (Supplementary Methods). We computed the SI for all pairs of IC-LFPs and for the three components simultaneously. Phase delay and phase difference distributions between layer-specific theta oscillations are shown in Figure 2b and Figure S1, respectively. Synchronization between theta current generators varied dynamically within recording sessions, with periods of low SI alternating with periods of high SI (Figure 2c). Measured over all recording sessions and animals, high synchronization between pairs of theta generators dominated (Figure 2d) with the distribution of SI values per theta cycle showing a peak close to perfect phase locking (Figure 2d). The highest synchronization was found between PP-IC and Im-IC (ANOVA with degrees of freedom corrected by Greenhouse-Geisser,  $F(1.165,4.660)=531.8$ ;  $p<0.001$  for mean SI values), likely reflecting the tight coordination between the afferences received from layers II and III of the EC. Interestingly, synchronization computed for the three theta oscillations simultaneously, showed a broader distribution with peaks at low and high SI values, revealing the coexistence of both, desynchronized and highly synchronized states, respectively (Figure 2d). Measuring the average SI in sliding time windows of increasing duration, we found that high synchronization epochs preferentially last three consecutive theta cycles (Figure S2)<sup>18</sup>.

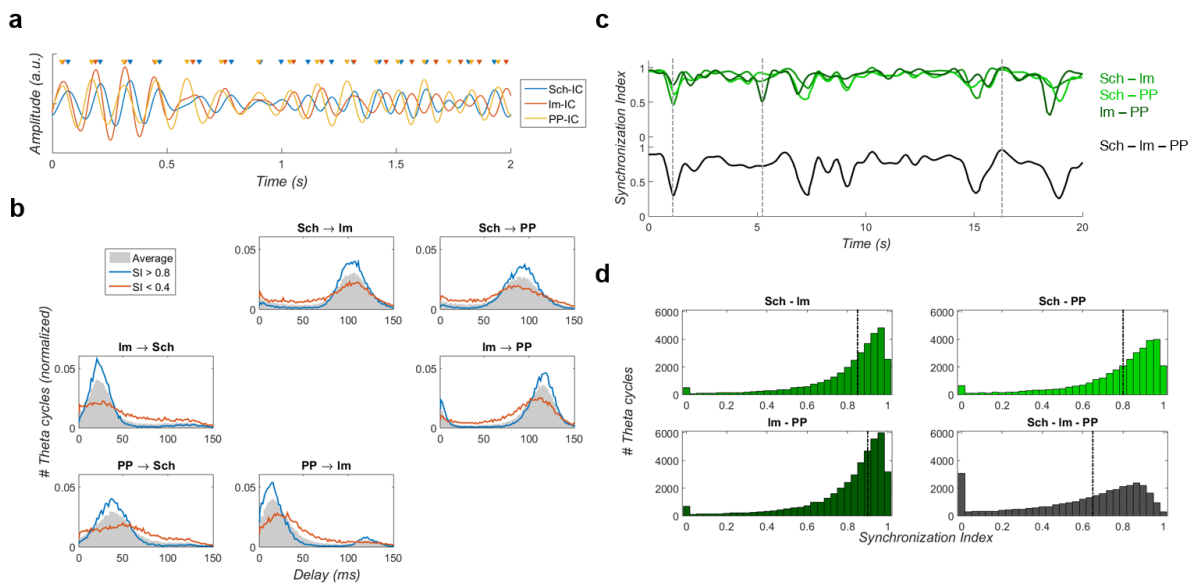

**Figure 2. Synchronization between layer-specific theta oscillations.**

(a) Representative band-pass filtered theta oscillations in the three IC-LFPs. Upper triangles mark the peaks of the theta cycles, showing a variation in their sequence along time.

(b) Histograms of delay differences between theta oscillations. Blue and red lines represent the normalized distribution during periods of high ( $SI > 0.8$ ) or low ( $SI < 0.4$ ) theta synchronization in the three IC-LFPs simultaneously. Synchronized cycles tend to occur always with the same delay.

(c) Representative values of SI in one animal along time. Dashed lines indicate moments of marked asynchrony in the trio of theta oscillations, synchrony in pairs and full synchronization.

(d) Histograms of the number of theta cycles per SI value. Dashed lines mark the middle of the distribution in all cases. The highest probability of synchronization was found between Im-IC and PP-IC, and the minimum when all IC were considered.

We further found that theta power in Im-IC and PP-IC correlated with the synchronization state, with larger theta power associated with higher synchronization (Figure 3a and 3b). Theta frequency was higher in average in the Sch-IC (ANOVA,  $F(1.359,5.436)=54.94$ ,  $p<0.05$ ), and correlated with theta synchronization in all IC-LFPs, but most notably in Im-IC and PP-IC (Figure 3d). Larger SI values were associated with higher theta frequency (Figure 3d), with maximal frequency values undistinguishable between IC-LFPs (ANOVA,  $F(1.163,4.651)=4.443$ ,  $p>0.05$ ). In this way, high synchronization states between the three generators are reached by increasing the theta frequencies in PP-IC and Im-IC to match the Sch-IC frequency. Overall, these results indicate that although a single coherent theta rhythm can be found across hippocampal layers, layer-specific theta oscillations also appear desynchronized, supporting the coexistence of different theta frameworks. In contrast to theta power, broadband (30-150 Hz) gamma power did not

correlate with theta synchronization in any IC-LFP (Figure 3a and 3c), indicating that broadband gamma power is not driven by theta synchronization.

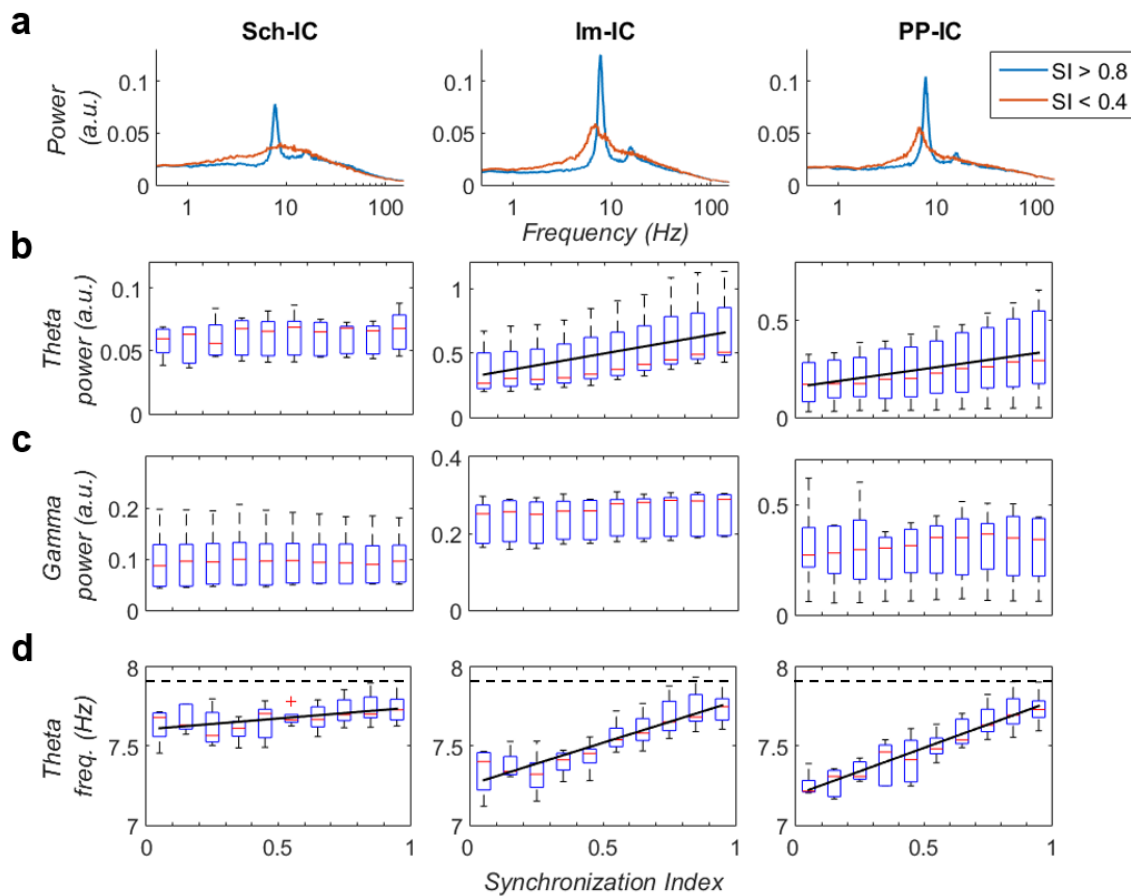

**Figure 3. Characterization of theta and gamma oscillations as a function of the theta synchronization.**

(a) Power spectrum of the IC-LFPs during high (blue,  $SI > 0.8$ ) and low (red,  $SI < 0.4$ ) theta synchronization epochs. A strong increase and right-shift of the theta peak can be seen during theta synchronization.

(b) Theta power correlates with SI in Im-IC and PP-IC (black lines represent statistically significant linear correlations;  $R=0.42/0.32$ ,  $p<0.01/0.05$ , respectively),

(c) Gamma power is not correlated with SI.

(d) Theta frequency significantly correlates with SI in all IC-LFPs ( $R=0.39/0.80/0.86$ ,  $p<0.01/0.0001/0.0001$ , respectively). Horizontal dashed lines mark the same frequency in all panels. Here and in the next figures, box-and-whisker plots, represent the complete data range (whiskers), the first and third quartiles (box) and the median (red line). Points are drawn as outliers (red crosses) if they are larger than  $q3 + 1.5(q3 - q1)$  or smaller than  $q1 - 1.5(q3 - q1)$ , where  $q1$  and  $q3$  are the 25th and 75th percentiles, respectively.

### Theta-gamma CFC reflects layer-specific interactions

The existence of different theta frameworks opens the possibility to multiple theta-gamma interactions (Figure 4a). We therefore computed the theta-gamma CFC within and



between hippocampal layers. We first measured the amplitude of gamma oscillations in the three IC-LFPs referenced to the phase of theta recorded in the CA1 pyramidal layer, as is usually done<sup>14,15,18,21–24,40</sup>. The results (Figure 4b) confirmed previous findings showing coupling between CA1 theta and a slow gamma band of CA3 origin (Sch-IC; maximal modulation at  $37.5 \pm 5$  Hz, CA1 $\gamma$ S)<sup>18,21,22</sup> and a medium gamma band of EC3 origin (Im-IC;  $82.5 \pm 4$  Hz medium gamma, CA1 $\gamma$ M)<sup>18,21,22</sup>. They also revealed an additional theta-nested fast gamma band ( $130 \pm 10$  Hz,) in the mid-molecular layer of the DG (DG $\gamma$ F) overlapping the terminal field of EC2 inputs, compatible with the previously found theta-gamma CFC in the DG<sup>4</sup>. DG $\gamma$ F and CA1 $\gamma$ M in PP-IC and Im-IC, respectively, were locked close to  $180^\circ$  phase (Figure 4d) as shown before<sup>38</sup>. CA1 $\gamma$ M activity was closely followed by CA1 $\gamma$ S in the theta cycle (Figure 4d)<sup>21</sup>. The key new finding in our analysis was the existence of theta-gamma coupling dominant within each layer, this is, the CFC between the theta and gamma oscillations recorded in the same IC-LFP was stronger than any between-layer combination (Figure 4c and 4d and Figure S3). Theta-gamma CFC reflects layer-specific interactions and further supports the existence of independent theta-gamma synchronization frameworks in the hippocampus<sup>32</sup>, rather than a single theta framework that implies a unique carrier theta wave to which the gamma activity is multiplexed in segregated theta-gamma channels.

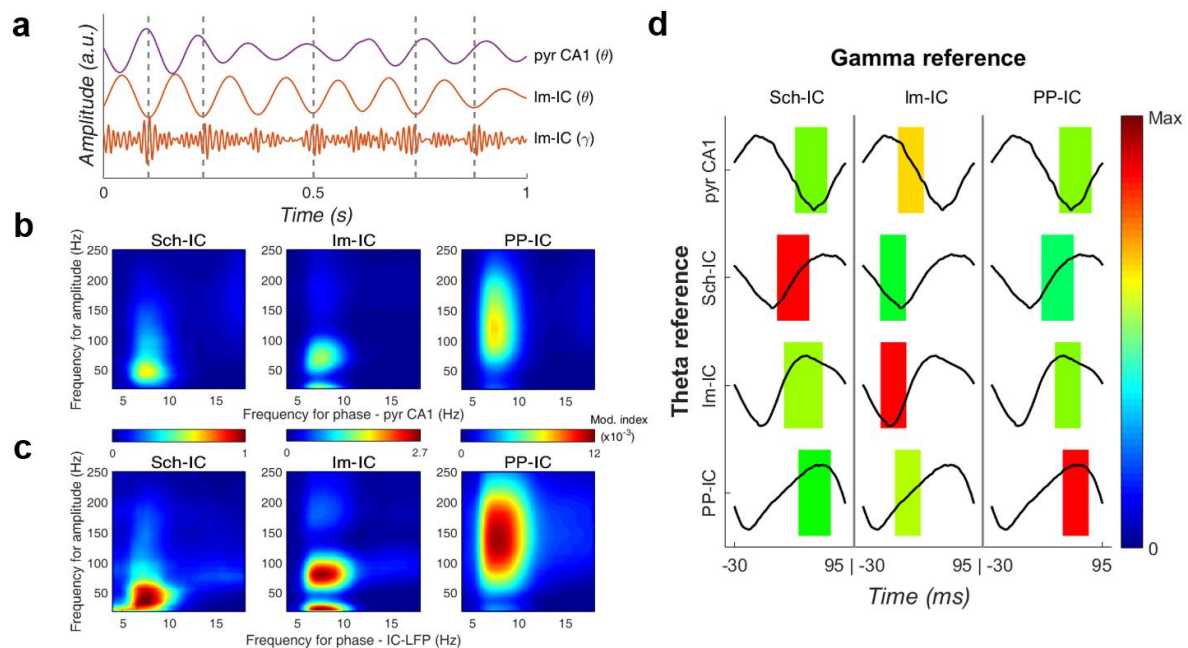

**Figure 4. Theta-gamma coupling reflects layer-specific interactions.**

- (a) Representative theta- and gamma-filtered traces of Im-IC showing how the gamma envelope is phase-locked at the trough of the theta oscillation recorded in the same IC-LFP, but not with the oscillation recorded in the CA1 pyramidal layer (pyr CA1).
- (b) CFC between gamma amplitude recorded in the different IC-LFPs and the theta phase of pyr CA1.
- (c) Same as (b) but using the theta phase recorded in the corresponding IC-LFPs. Same color scales, representing the modulation index (MI), have been used for the same IC-LFPs in panels (b) and (c).
- (d) Strength of the CFC across all gamma and theta oscillations recorded in the three IC-LFPs and pyr CA1. MI is color-coded. The location and width of the rectangles indicate the theta phase at which gamma amplitude is coupled. Theta waveforms (black traces) are extracted as the average of all theta cycles in the corresponding signals. The highest CFC strength was always found between theta and gamma oscillations of the same anatomical layer (See Figure S3 for statistics).

### **Synchronization between theta frameworks is associated to local theta-gamma CFC**

Knowing that theta-gamma CFC is layer-specific (Figure 4) and that different layers can oscillate relatively independently (Figure 2 and 3)<sup>32</sup>, we explored theta-gamma CFC accounting for the different synchronization states. This analysis unveiled a striking correlation between the CFC and theta synchronization (Figure 5a). Strong theta-gamma modulation was associated to high SI values, while weak or nearly absent CFC was found in periods of low SI (Figure 5b). This result indicated that within-layer CFC was associated to the synchronization between layers and allowed us to hypothesize that CFC could represent a mechanism to synchronize theta frameworks.

Theta and gamma oscillations reflect the extracellularly added synaptic and active dendritic currents of two processes occurring at different timescales, the second being tightly paced by inhibitory neurons<sup>37</sup>. We asked which of these processes was driving the CFC between the two frequencies. We computed the cross-frequency directionality index<sup>41</sup> (CFD) (Supplementary Methods), based on the phase-slope index, which computes the phase difference between two signals as an indication of directed interactions between both frequencies. An increase of the phase difference between the theta phase and the gamma amplitude with frequency gives rise to a positive slope of the phase spectrum (i.e. a positive CFD value) when the phase of the slow oscillation sets the amplitude of the fast, and negative otherwise. As shown in Figure 5c for the averaged data, and Figure S4 for individual animals, in all considered cases CFD resulted in negative values for the specific gamma bands nested to the theta oscillations in each IC-LFP (CA1 $\gamma$ S, CA1 $\gamma$ M and DG $\gamma$ F, respectively). This was the case whether we analysed the complete time series, or split them into theta-synchronized (SI > 0.8) or desynchronized (SI < 0.4) epochs (Figure 5c). The results suggested that the amplitude of the gamma oscillation effectively modulates the phase of the theta wave.

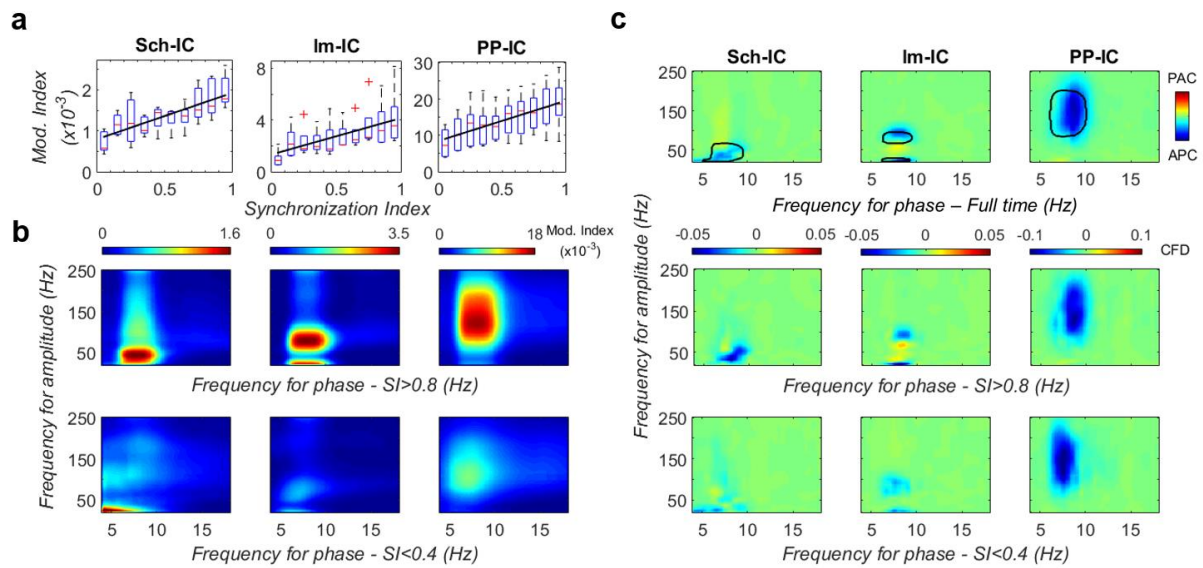

**Figure 5. Theta-gamma interactions depend on theta synchronization.**

(a) The MI of theta-gamma CFC positively correlates with theta synchronization ( $R=0.67/0.52/0.52$ ,  $p<0.0001/0.001/0.001$ , for Sch-IC, Im-IC and PP-IC, respectively).

(b) Average CFC during epochs of high (upper,  $SI > 0.8$ ) or low (lower,  $SI < 0.4$ ) synchronization.

(c) Within-layer CFD analysis reveals maximum negative values (amplitude-phase coupling) for those pairs of theta-gamma oscillations with the highest CFC (encircled area). These results suggested a driving role of gamma activity over the theta phase, which is maintained during epochs of high and low SI.

## Behavioural modulation of theta synchronization and CFC

The strength of CFC in the hippocampus has been shown to correlate with learning<sup>15</sup> and we found here that it correlates with theta coherence across hippocampal layers (Figure 5a). We hypothesized that the CFC represents a mechanism to synchronize theta oscillations and coordinate information transmission across hippocampal layers. This hypothesis allows us to predict that CFC and theta synchronization would predominate during learning, maximally when the animal updates an existing memory with novel information, a condition likely requiring coordination between incoming sensory inputs, the retrieval of the stored contextual information and updating the memory with new information<sup>42-44</sup>.

Therefore, in our final set of experiments we tested this prediction using two behavioural paradigms. In the first one, novel information was added on top of a stored contextual memory. In the second, a hippocampus-dependent delayed spatial alternation task was used in which the animal needed to remember the arm visited in the previous trial and

update the memory with the choice made in the current trial<sup>45-47</sup>. In the first task, after habituation to an open field (8 min session 1 per day during 8-10 days), we introduced a novel tactile stimulus in the floor of the otherwise unchanged field (novelty session, see Supplementary Methods). We computed and compared theta synchrony and CFC between the novelty session and the habituation session the day before. When the animal entered the arena, the theta SI was high and comparable in both conditions during the first two minutes of exploration (Figure 6a, t1). As the animal explored the context, synchronization remained high during novelty, but rapidly decayed in the known environment (Figure 6a, t2). Consistent with the notion of information transmission to update an existing memory, by the end of the exploration time both conditions decreased to the same level of theta synchronization (Figure 6a, t3), when the introduced tactile stimulus lost its novelty. The simultaneously computed CFC MI correlated with theta synchronization during the complete session in both conditions, as shown in Figure 6a and 6b. Importantly, CFC strength was higher during the novelty sessions, when the theta synchronization was also higher, and decreased towards the end of the session in parallel with SI (Figure 6b).

In the second experiment, rats learned in an 8-shaped T-maze to alternate between the left or right arms on successive trials for water reward (Fig. 6d). In this task, the central arm is associated with memory recall, decision making and encoding of the current decision<sup>14,46-48</sup>. We first computed and compared theta-gamma CFC between the side and central arms and found significantly increased modulation in the central arm for the three IC-LFPs (Fig. 6e). This result is consistent with previously shown increased CFC in the same task in the CA1 *radiatum* and *lacunosum-moleculare* IC-LFPs<sup>21</sup>, although in that case the authors used a common theta reference recorded in CA1 pyramidal layer. Theta synchronization across hippocampal layers in the T-maze showed comparable average values as during open field explorations (Fig. 6f) and, again, differentiated between side and central arms (Fig. 6g). Importantly, the SI was higher in the central arm (Fig. 6g) consistent with the higher CFC MI found in the same behavioural epochs (Fig. 6e). Overall these results support the above prediction and the idea that CFC synchronizes theta frameworks in the hippocampus facilitating information transmission to update a contextual memory.

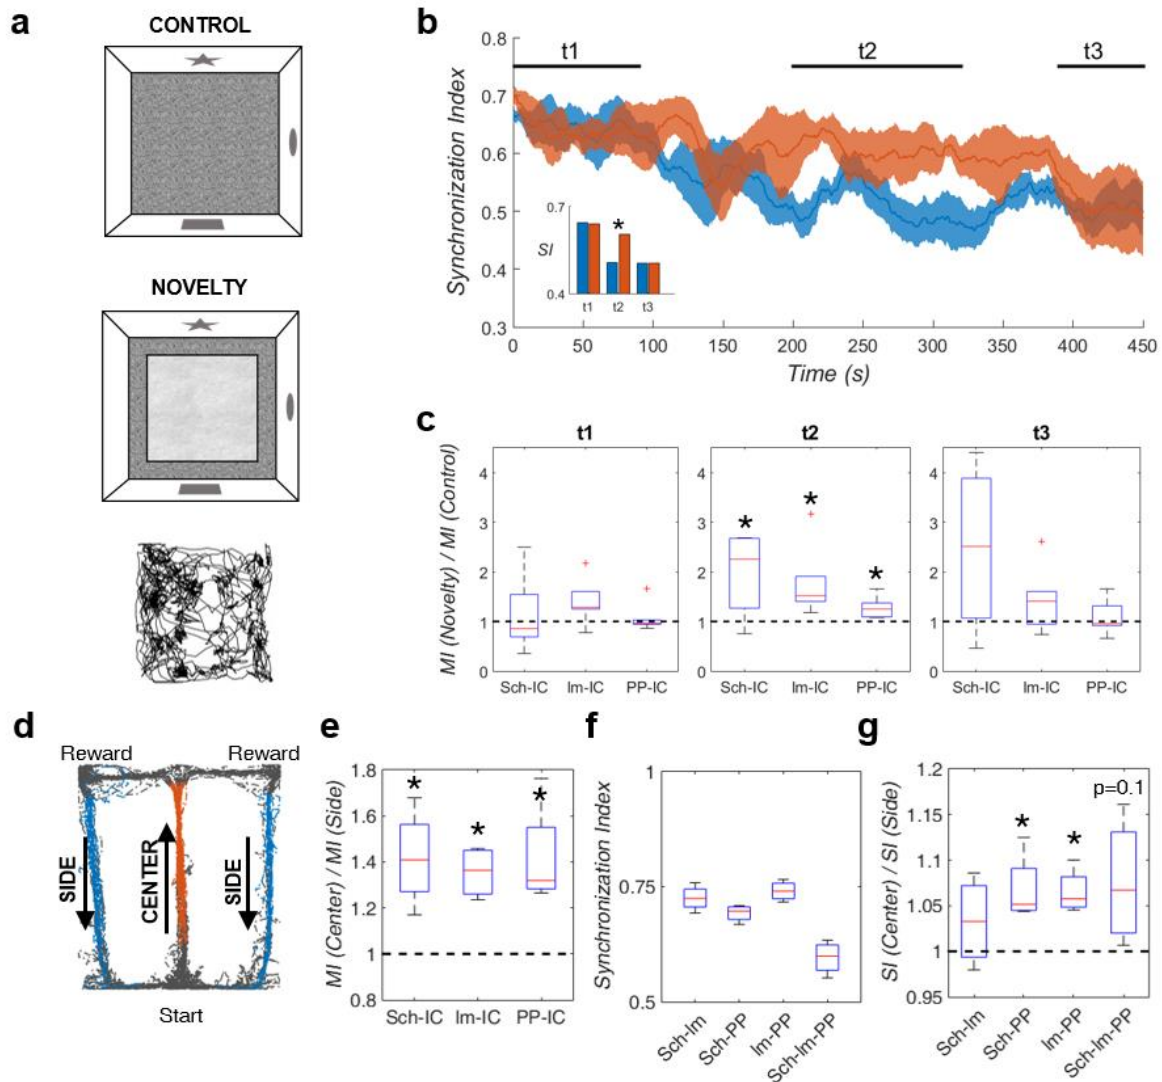

**Figure 6.** Local theta-gamma CFC and global theta synchronization change in parallel and associated with specific behavioural epochs.

(a) Scheme of known (top) and novel (middle) open-field contexts. After the habituation period (control), the animals were exposed to a different floor (sand paper) located inside the familiar open field, providing a new tactile stimulus (novelty). An example of the exploration trajectories is shown (bottom).

(b) Time evolution of the SI (mean  $\pm$  s.e.m. across all subjects) during exploration: before (blue) and after (red) the introduction of the novel tactile stimulus. Both conditions have a maximum SI value at the beginning of the task (t1), corresponding to the initial exploration, followed by a decay in control but not in novelty (t2, inset \*  $p < 0.05$ , t-test). Both conditions decrease to the same SI level by the end of the exploration time (t3).

(c) CFC ratio computed as the ratio between the MI in the novelty condition with respect to the control one (\*  $p < 0.05$ , t-test).

(d) Example of running trajectories during the T-maze task.

(e) Ratio between the MI at the center of the maze and that at the sides (\*  $p < 0.05$ , t-test).

(f) Average value of SI in the complete T-maze task (mean  $\pm$  s.e.m. across all subjects).

(g) SI ratio between CENTER and SIDE for each possible combination of IC-LFPs (\*  $p < 0.05$ , t-test).

## Discussion

Overall, our results provide functional evidence supporting independent theta oscillations in the hippocampus whose coordination can be seen as a mechanism to channel information between hippocampal layers and binds distributed computations. Less synchronized theta states may secure relatively independent processing in local circuits of the hippocampal formation. Theta coordination (phase locking) is achieved by increasing theta frequency in all layers, most notably in those receiving EC inputs, and strongly correlates with the strength of theta-gamma CFC, so that coherent theta oscillation across hippocampal layers is associated with stronger CFC. Furthermore, directionality analysis suggests that band- and layer-specific gamma activity contributes to the synchronization of theta oscillations across layers. We thus hypothesize that the CFC represents a mechanism operated by gamma activity to coordinate theta oscillations in separated regions. In a network with multiple connected nodes, theta-phase locking between specific nodes will further contribute to the directionality of the information flow, habilitating targets between which communication is permitted in defined time windows. We have provided evidence supporting this hypothesis by showing that CFC and the coordination between the theta generators recorded in the hippocampus increase in the mnemonic process.

Extensive previous research has demonstrated the existence of multiple theta rhythms and current generators in the hippocampus and EC (reviewed in <sup>19</sup>. While septal activity is required for theta rhythmicity, and lesions targeting the medial septum eliminate theta oscillation in both structures, intrinsic hippocampal activity from CA3 and extrinsic EC inputs do also contribute to the recorded theta oscillations<sup>19</sup>. Surgical removal of the EC unveils a theta oscillation that depends on the integrity of CA3 and is highly coherent across hippocampal layers<sup>4</sup>. In the presence of an intact EC, however, the coherence between theta signals in the *stratum radiatum* and *lacunosum-moleculare*, receiving the inputs from CA3 and EC3 respectively, is reduced<sup>32</sup>. The relative independency of theta oscillations in these layers is supported by our findings, showing that frequency and phase can be regulated independently in these theta generators (Sch-IC and Im-IC, respectively, Figure 2 and 3). Furthermore, the key new finding of our experiments is that theta coherence between the generators is not fixed; it rather changes dynamically and is regulated by behaviour. Accordingly, periods of perfect phase locking (SI = 1) between Sch-IC and Im-IC were also frequent (Figure 2), and enhanced during particular behaviours (Figure 6). Brain oscillations can be seen as rhythmic changes in neuronal excitability that can define sequential information packages in the framework of assemblies<sup>16,49</sup>. Therefore, the dynamic variation

in theta synchrony between hippocampal layers found in this study, likely reflects the existence of multiple theta-coordinated time frames with phase differences between oscillations having a large impact on the timing of principal cells firing in the respective layers. Synchronization of theta frameworks will, in turn, coordinate, though not necessarily synchronize<sup>50</sup>, firing sequences in consecutive hippocampal stations.

Interactions between the phase of the theta oscillation and the amplitude (power) of the gamma activity have been extensively documented and proposed as an effective mechanism to integrate activity across different spatial and temporal scales<sup>1-18</sup>. In the hippocampus and despite the evidence supporting the existence of multiple theta generators (see above), theta-gamma CFC has been almost exclusively investigated as the statistical dependence between the gamma activity in different frequency bands and a single theta reference, most commonly recorded in the pyramidal layer of the CA1 region. Our analysis demonstrates that phase-amplitude CFC between theta and gamma oscillations in the hippocampus varies for different theta generators, and is stronger when both oscillations are recorded in the same anatomical layer (Figure 4 and Figure S3). This observation, together with previous and important evidence demonstrating that firing of principal cells in CA3 and EC3 is phase-locked to downstream gamma oscillations recorded in the CA1 *stratum radiatum* (CA1 $\gamma$ S) and *lacunosum-moleculare* (CA1 $\gamma$ M), respectively<sup>18,21,22</sup>, suggest that CFC is a local phenomenon driven by upstream afferences organizing downstream gamma oscillations. Our CFD analysis further supports this interpretation, since it shows a predominant amplitude-to-phase coupling for the same layer-specific gamma frequency bands. This does not mean that 4-11 Hz oscillations in the hippocampus are generated by gamma activity, on the contrary, our data suggest that gamma activities, reflecting the interplay of inhibitory-excitatory networks<sup>51-56</sup>, impose phase shifts on the on-going theta oscillations in their corresponding layers. Therefore, we hypothesize that local gamma-generating circuits, driven by afferences from their respective upstream layers, might not be activated at a particular theta phase, as commonly interpreted, but rather, might be actually setting the phase of the local theta oscillation. This interpretation would also explain phase-phase coupling between CA1 theta and CA1 $\gamma$ S and CA1 $\gamma$ M<sup>57</sup>, as the consequence of theta phase driven by layer-specific gamma activity entrained by upstream inputs in CA3 and EC3, respectively.

The proposed new scenario provides a mechanism to coordinate distributed computations organized in theta waves, by synchronizing theta oscillations in connected

regions through theta-gamma CFC. The highly significant positive correlation between CFC strength and theta synchronization found in our study (Figure 5) supports this view. In this way, our results link theta-gamma CFC<sup>6</sup> and coherence-based communication<sup>49</sup>, the first being the mechanism to align higher excitability windows to open communication channels between defined network nodes. A number of different studies investigating learning and memory processes in the entorhinal-hippocampal network have indeed, but separately, reported increases in theta-gamma CFC or synchronization in different frequency bands associated with memory performance<sup>1-3,16</sup>. The association of both phenomena in our study has been possible by the separation of pathway-specific LFPs, identifying the CFC as a local phenomenon and separating theta activities, that otherwise would have rendered a mixed readout of theta-gamma interactions, highly dependent on electrode implantation coordinates and interindividual variability<sup>37</sup>. Here we have further demonstrated that the strong association between CFC and synchronization between the three theta oscillations predominantly occur when the animal updates a memory with novel information (Figure 6). The behavioural test used were selected to contrast behavioural epochs in which the animal explores a known environment, recalling its representation from memory, and simultaneously needs to encode new information (novel stimuli, last arm visited) to update the memory. In this condition, several processing streams likely coexist and need to coordinate in the entorhinal-hippocampal network<sup>42-44</sup>. It is in these conditions that we found an increased association between CFC strength and theta synchronization across layers, suggesting its role in coordinating distributed computation during memory formation.

We have suggested a causal link between CFC strength and theta synchronization through the gamma-driven adjustment of theta phase and frequency (Figure 3 and 5). While dissecting the precise circuit mechanisms supporting the transfer function from gamma activity to theta phase is out of the scope of the present work, several possibilities exist. Computational works have demonstrated that theta-gamma CFC emerges from the interactions between functionally distinct interneuron populations, as the basket and *oriens-lacunosum-moleculare* (OLM) cells, interconnected in a network of principal cells receiving an external theta rhythm generator, such as the septal input<sup>53-56</sup>. The on-going theta oscillation is thus modulated by the inhibitory network, whose activity is known to be reflected in the gamma activity in *in vivo* extracellular recordings<sup>40,51,52</sup>, and is associated to layer-specific inputs<sup>18,21,22</sup>. Subsets of interneurons can phase-lock to different hippocampal rhythms<sup>58,59</sup> and, interestingly, recent findings showed in the CA1 region that some



interneurons can specifically phase-lock to CA1 $\gamma$ S and others to CA1 $\gamma$ M, supporting the idea that different classes of interneurons drive slow and medium gamma oscillations<sup>22,24,60</sup>. Thus, an appealing mechanism for gamma-modulation of theta phase would be the control of different interneuron classes by layer specific inputs, which would entrain specific gamma networks modulating principal cell excitability and firing in response to on-going theta inputs, advancing or delaying theta phase. Spiking resonance in principal cells may contribute to this mechanism too, since optogenetic activation of basket interneurons (parvalbumin expressing cells) in the hippocampus and neocortex has been shown to pace pyramidal cell firing in the theta range, by virtue of postinhibitory rebound of  $I_h$  activity<sup>51</sup>. In that experiment, theta-band firing of excitatory neurons required rhythmic activation of basket cells, as white noise activation effectively modulated their activity but did not entrained pyramidal theta-band firing<sup>51</sup>, suggesting that feed-forward activation of interneurons from upstream layers or an external rhythmic input (i.e. cholinergic or GABAergic inputs from the septum), are required for resonance amplification. Thus, intrinsic cellular properties and network mechanism may interact to support gamma-dependent coordination of theta phases across hippocampal layers.

Interactions between slow and fast brain oscillations have been measured in multiple brain regions during perception, attention, learning and memory formation<sup>1-3</sup>. Despite its ubiquitous presence in fundamental cognitive processes, its function is largely unknown. Our results provide a mechanism for binding distributed computations packed on theta waves and routing the information flow based on theta-gamma cross-frequency coupling. Important questions remain to be answered. How theta synchronization in the hippocampus relates to hippocampal-neocortical interactions<sup>61,62</sup> known to be favoured at theta and beta frequencies<sup>63,64</sup> and modulated by synaptic plasticity in the hippocampus<sup>65,66</sup>? The conditions triggering the coordination between theta-gamma frameworks are not well understood, nor are the precise cognitive processes they subserve, but given that theta-gamma uncoupling seems to represent an early electrophysiological signature of hippocampal network dysfunction in Alzheimer's disease<sup>67-70</sup> as well as for schizophrenia and other psychiatric disorders<sup>71-73</sup>, further and detailed mechanistic investigations are granted.

## Acknowledgments

We thank Begoña Fernández for excellent technical assistance and Laura Pérez-Cerveza for her input during data pre-processing with ICA. S.C. and D.M. were supported by the Spanish Ministerio de Economía y Competitividad (MINECO) and FEDER funds under Grant Nos. BFU2015-64380-C2-1-R and -2-R, respectively. S.C. was supported by the European Union Horizon 2020 research and innovation programme under Grant Agreement No. 668863 (SyBil-AA) and acknowledges financial support from the Spanish State Research Agency, through the Severo Ochoa Program for Centres of Excellence in R&D (SEV- 2017-0723). C.R.M. and E.P. acknowledge support from MINECO through project Nos. TEC2016-80063-C3-3-R and -2-R, respectively. C.R.M. also acknowledges financial support from the Spanish State Research Agency, through the María de Maeztu Program for Units of Excellence in R&D (MDM-2017-0711). O.H. was supported by MINECO under Grant No. SAF2016-80100-R. V.J.L. was supported by a predoctoral fellowship La Caixa-Severo Ochoa from Obra Social La Caixa.

## References

1. Buzsáki, G. & Draguhn, A. Neuronal oscillations in cortical networks. *Science* **304**, 1926–1929 (2004).
2. Engel, A. K., Fries, P. & Singer, W. Dynamic predictions: oscillations and synchrony in top-down processing. *Nat. Rev. Neurosci.* **2**, 704–716 (2001).
3. Lisman, J. E. & Jensen, O. The  $\theta$ - $\gamma$  neural code. *Neuron* **77**, 1002–1016 (2013).
4. Bragin, A. *et al.* Gamma (40-100 Hz) oscillation in the hippocampus of the behaving rat. *J. Neurosci. Off. J. Soc. Neurosci.* **15**, 47–60 (1995).
5. Soltesz, I. & Deschênes, M. Low- and high-frequency membrane potential oscillations during theta activity in CA1 and CA3 pyramidal neurons of the rat hippocampus under ketamine-xylazine anesthesia. *J. Neurophysiol.* **70**, 97–116 (1993).
6. Lisman, J. E. & Idiart, M. A. Storage of 7 +/- 2 short-term memories in oscillatory subcycles. *Science* **267**, 1512–1515 (1995).

7. Canolty, R. T. *et al.* High Gamma Power Is Phase-Locked to Theta Oscillations in Human Neocortex. *Science* **313**, 1626–1628 (2006).
8. Lakatos, P. *et al.* An oscillatory hierarchy controlling neuronal excitability and stimulus processing in the auditory cortex. *J. Neurophysiol.* **94**, 1904–1911 (2005).
9. Bruns, A. & Eckhorn, R. Task-related coupling from high- to low-frequency signals among visual cortical areas in human subdural recordings. *Int. J. Psychophysiol. Off. J. Int. Organ. Psychophysiol.* **51**, 97–116 (2004).
10. Lakatos, P., Karmos, G., Mehta, A. D., Ulbert, I. & Schroeder, C. E. Entrainment of neuronal oscillations as a mechanism of attentional selection. *Science* **320**, 110–113 (2008).
11. Saleh, M., Reimer, J., Penn, R., Ojakangas, C. L. & Hatsopoulos, N. G. Fast and slow oscillations in human primary motor cortex predict oncoming behaviorally relevant cues. *Neuron* **65**, 461–471 (2010).
12. Palva, J. M., Palva, S. & Kaila, K. Phase synchrony among neuronal oscillations in the human cortex. *J. Neurosci. Off. J. Soc. Neurosci.* **25**, 3962–3972 (2005).
13. Mormann, F. *et al.* Phase/amplitude reset and theta-gamma interaction in the human medial temporal lobe during a continuous word recognition memory task. *Hippocampus* **15**, 890–900 (2005).
14. Tort, A. B. L. *et al.* Dynamic cross-frequency couplings of local field potential oscillations in rat striatum and hippocampus during performance of a T-maze task. *Proc. Natl. Acad. Sci. U. S. A.* **105**, 20517–20522 (2008).
15. Tort, A. B. L., Komorowski, R. W., Manns, J. R., Kopell, N. J. & Eichenbaum, H. Theta–gamma coupling increases during the learning of item–context associations. *Proc. Natl. Acad. Sci.* **106**, 20942–20947 (2009).
16. Canolty, R. T. & Knight, R. T. The functional role of cross-frequency coupling. *Trends Cogn. Sci.* **14**, 506–515 (2010).

17. Fell, J. & Axmacher, N. The role of phase synchronization in memory processes. *Nat. Rev. Neurosci.* **12**, 105–118 (2011).
18. Colgin, L. L. *et al.* Frequency of gamma oscillations routes flow of information in the hippocampus. *Nature* **462**, 353–357 (2009).
19. Buzsáki, G. Theta oscillations in the hippocampus. *Neuron* **33**, 325–340 (2002).
20. Vanderwolf, C. H. Hippocampal electrical activity and voluntary movement in the rat. *Electroencephalogr. Clin. Neurophysiol.* **26**, 407–418 (1969).
21. Schomburg, E. W. *et al.* Theta Phase Segregation of Input-Specific Gamma Patterns in Entorhinal-Hippocampal Networks. *Neuron* **84**, 470–485 (2014).
22. Lasztóczy, B. & Klausberger, T. Layer-specific GABAergic control of distinct gamma oscillations in the CA1 hippocampus. *Neuron* **81**, 1126–1139 (2014).
23. Lasztóczy, B. & Klausberger, T. Hippocampal Place Cells Couple to Three Different Gamma Oscillations during Place Field Traversal. *Neuron* **91**, 34–40 (2016).
24. Fernández-Ruiz, A. *et al.* Entorhinal-CA3 Dual-Input Control of Spike Timing in the Hippocampus by Theta-Gamma Coupling. *Neuron* **93**, 1213–1226.e5 (2017).
25. Alonso, A. & García-Austt, E. Neuronal sources of theta rhythm in the entorhinal cortex of the rat. II. Phase relations between unit discharges and theta field potentials. *Exp. Brain Res.* **67**, 502–509 (1987).
26. Charpak, S., Paré, D. & Llinás, R. The entorhinal cortex entrains fast CA1 hippocampal oscillations in the anaesthetized guinea-pig: role of the monosynaptic component of the perforant path. *Eur. J. Neurosci.* **7**, 1548–1557 (1995).
27. Winson, J. Patterns of hippocampal theta rhythm in the freely moving rat. *Electroencephalogr. Clin. Neurophysiol.* **36**, 291–301 (1974).
28. Bland, B. H. & Whishaw, I. Q. Generators and topography of hippocampal theta (RSA) in the anaesthetized and freely moving rat. *Brain Res.* **118**, 259–280 (1976).

29. Green, K. F. & Rawlins, J. N. Hippocampal theta in rats under urethane: generators and phase relations. *Electroencephalogr. Clin. Neurophysiol.* **47**, 420–429 (1979).
30. H. Vanderwolf, C., Bland, B. & Wishaw, I. Diencephalic, Hippocampal, and Neocortical Mechanisms in Voluntary Movement. *Efferent Organ. Integr. Behav.* (1973). doi:10.1016/B978-0-12-476950-2.50014-2
31. Kramis, R., Vanderwolf, C. H. & Bland, B. H. Two types of hippocampal rhythmical slow activity in both the rabbit and the rat: relations to behavior and effects of atropine, diethyl ether, urethane, and pentobarbital. *Exp. Neurol.* **49**, 58–85 (1975).
32. Kocsis, B., Bragin, A. & Buzsáki, G. Interdependence of Multiple Theta Generators in the Hippocampus: a Partial Coherence Analysis. *J. Neurosci.* **19**, 6200–6212 (1999).
33. Makarov, V. A., Makarova, J. & Herreras, O. Disentanglement of local field potential sources by independent component analysis. *J. Comput. Neurosci.* **29**, 445–457 (2010).
34. Makarova, J., Ibarz, J. M., Makarov, V. A., Benito, N. & Herreras, O. Parallel readout of pathway-specific inputs to laminated brain structures. *Front. Syst. Neurosci.* **5**, 77 (2011).
35. Fernández-Ruiz, A. & Herreras, O. Identifying the synaptic origin of ongoing neuronal oscillations through spatial discrimination of electric fields. *Front. Comput. Neurosci.* **7**, (2013).
36. Benito, N. *et al.* Spatial modules of coherent activity in pathway-specific LFPs in the hippocampus reflect topology and different modes of presynaptic synchronization. *Cereb. Cortex N. Y. N 1991* **24**, 1738–1752 (2014).
37. Herreras, O. Local Field Potentials: Myths and Misunderstandings. *Front. Neural Circuits* **10**, 101 (2016).
38. Mizuseki, K., Sirota, A., Pastalkova, E. & Buzsáki, G. Theta oscillations provide temporal windows for local circuit computation in the entorhinal-hippocampal loop. *Neuron* **64**, 267–280 (2009).
39. Fernández-Ruiz, A., Makarov, V. A., Benito, N. & Herreras, O. Schaffer-specific local field potentials reflect discrete excitatory events at gamma frequency that may fire postsynaptic hippocampal CA1 units. *J. Neurosci. Off. J. Soc. Neurosci.* **32**, 5165–5176 (2012).

40. Csicsvari, J., Hirase, H., Czurkó, A., Mamiya, A. & Buzsáki, G. Oscillatory coupling of hippocampal pyramidal cells and interneurons in the behaving Rat. *J. Neurosci. Off. J. Soc. Neurosci.* **19**, 274–287 (1999).
41. Jiang, H., Bahramisharif, A., van Gerven, M. A. J. & Jensen, O. Measuring directionality between neuronal oscillations of different frequencies. *NeuroImage* **118**, 359–367 (2015).
42. Dudai, Y. & Morris, R. G. M. Memorable trends. *Neuron* **80**, 742–750 (2013).
43. Buzsáki, G. & Moser, E. I. Memory, navigation and theta rhythm in the hippocampal-entorhinal system. *Nat. Neurosci.* **16**, 130–138 (2013).
44. Wang, S.-H. & Morris, R. G. M. Hippocampal-neocortical interactions in memory formation, consolidation, and reconsolidation. *Annu. Rev. Psychol.* **61**, 49–79, C1-4 (2010).
45. Ainge, J. A., van der Meer, M. A. A., Langston, R. F. & Wood, E. R. Exploring the role of context-dependent hippocampal activity in spatial alternation behavior. *Hippocampus* **17**, 988–1002 (2007).
46. Montgomery, S. M. & Buzsáki, G. Gamma oscillations dynamically couple hippocampal CA3 and CA1 regions during memory task performance. *Proc. Natl. Acad. Sci. U. S. A.* **104**, 14495–14500 (2007).
47. Wood, E. R., Dudchenko, P. A., Robitsek, R. J. & Eichenbaum, H. Hippocampal neurons encode information about different types of memory episodes occurring in the same location. *Neuron* **27**, 623–633 (2000).
48. DeCoteau, W. E. *et al.* Learning-related coordination of striatal and hippocampal theta rhythms during acquisition of a procedural maze task. *Proc. Natl. Acad. Sci.* **104**, 5644–5649 (2007).
49. Fries, P. A mechanism for cognitive dynamics: neuronal communication through neuronal coherence. *Trends Cogn. Sci.* **9**, 474–480 (2005).
50. Mizuseki, K. & Buzsáki, G. Theta oscillations decrease spike synchrony in the hippocampus and entorhinal cortex. *Philos. Trans. R. Soc. Lond. B. Biol. Sci.* **369**, 20120530 (2014).

51. Stark, E. *et al.* Inhibition-induced theta resonance in cortical circuits. *Neuron* **80**, 1263–1276 (2013).
52. Cardin, J. A. *et al.* Driving fast-spiking cells induces gamma rhythm and controls sensory responses. *Nature* **459**, 663–667 (2009).
53. Rotstein, H. G. *et al.* Slow and fast inhibition and an H-current interact to create a theta rhythm in a model of CA1 interneuron network. *J. Neurophysiol.* **94**, 1509–1518 (2005).
54. Orbán, G., Kiss, T. & Erdi, P. Intrinsic and synaptic mechanisms determining the timing of neuron population activity during hippocampal theta oscillation. *J. Neurophysiol.* **96**, 2889–2904 (2006).
55. Tort, A. B. L., Rotstein, H. G., Dugladze, T., Gloveli, T. & Kopell, N. J. On the formation of gamma-coherent cell assemblies by oriens lacunosum-moleculare interneurons in the hippocampus. *Proc. Natl. Acad. Sci. U. S. A.* **104**, 13490–13495 (2007).
56. Neymotin, S. A. *et al.* Ketamine disrupts  $\theta$  modulation of  $\gamma$  in a computer model of hippocampus. *J. Neurosci. Off. J. Soc. Neurosci.* **31**, 11733–11743 (2011).
57. Belluscio, M. A., Mizuseki, K., Schmidt, R., Kempter, R. & Buzsáki, G. Cross-frequency phase-phase coupling between  $\theta$  and  $\gamma$  oscillations in the hippocampus. *J. Neurosci. Off. J. Soc. Neurosci.* **32**, 423–435 (2012).
58. Klausberger, T. & Somogyi, P. Neuronal diversity and temporal dynamics: the unity of hippocampal circuit operations. *Science* **321**, 53–57 (2008).
59. Klausberger, T. *et al.* Brain-state- and cell-type-specific firing of hippocampal interneurons in vivo. *Nature* **421**, 844–848 (2003).
60. Colgin, L. L. Theta–gamma coupling in the entorhinal–hippocampal system. *Curr. Opin. Neurobiol.* **31**, 45–50 (2015).
61. Siapas, A. G., Lubenov, E. V. & Wilson, M. A. Prefrontal phase locking to hippocampal theta oscillations. *Neuron* **46**, 141–151 (2005).
62. Sirota, A. *et al.* Entrainment of neocortical neurons and gamma oscillations by the hippocampal theta rhythm. *Neuron* **60**, 683–697 (2008).

63. Igarashi, K. M., Lu, L., Colgin, L. L., Moser, M.-B. & Moser, E. I. Coordination of entorhinal-hippocampal ensemble activity during associative learning. *Nature* **510**, 143–147 (2014).
64. Moreno, A., Morris, R. G. M. & Canals, S. Frequency-Dependent Gating of Hippocampal-Neocortical Interactions. *Cereb. Cortex N. Y. N 1991* **26**, 2105–2114 (2016).
65. Canals, S., Beyerlein, M., Merkle, H. & Logothetis, N. K. Functional MRI evidence for LTP-induced neural network reorganization. *Curr. Biol. CB* **19**, 398–403 (2009).
66. Alvarez-Salvado, E., Pallarés, V., Moreno, A. & Canals, S. Functional MRI of long-term potentiation: imaging network plasticity. *Philos. Trans. R. Soc. Lond. B. Biol. Sci.* **369**, 20130152 (2014).
67. Palop, J. J. & Mucke, L. Epilepsy and cognitive impairments in Alzheimer disease. *Arch. Neurol.* **66**, 435–440 (2009).
68. Goutagny, R. *et al.* Alterations in hippocampal network oscillations and theta-gamma coupling arise before A $\beta$  overproduction in a mouse model of Alzheimer's disease. *Eur. J. Neurosci.* **37**, 1896–1902 (2013).
69. Verret, L. *et al.* Inhibitory interneuron deficit links altered network activity and cognitive dysfunction in Alzheimer model. *Cell* **149**, 708–721 (2012).
70. Iaccarino, H. F. *et al.* Gamma frequency entrainment attenuates amyloid load and modifies microglia. *Nature* **540**, 230–235 (2016).
71. Uhlhaas, P. J. & Singer, W. Neural synchrony in brain disorders: relevance for cognitive dysfunctions and pathophysiology. *Neuron* **52**, 155–168 (2006).
72. Phillips, W. A. & Silverstein, S. M. Convergence of biological and psychological perspectives on cognitive coordination in schizophrenia. *Behav. Brain Sci.* **26**, 65-82; discussion 82-137 (2003).
73. Olypher, A. V., Klement, D. & Fenton, A. A. Cognitive disorganization in hippocampus: a physiological model of the disorganization in psychosis. *J. Neurosci. Off. J. Soc. Neurosci.* **26**, 158–168 (2006).



74. Andersen, P., Holmqvist, B. & Voorhoeve, P. E. Entorhinal activation of dentate granule cells. *Acta Physiol. Scand.* **66**, 448–460 (1966).
75. Freeman, J. A. & Nicholson, C. Experimental optimization of current source-density technique for anuran cerebellum. *J. Neurophysiol.* **38**, 369–382 (1975).
76. Fernández-Ruiz, A., Makarov, V. A. & Herreras, O. Sustained increase of spontaneous input and spike transfer in the CA3-CA1 pathway following long-term potentiation in vivo. *Front. Neural Circuits* **6**, (2012).
77. Herreras, O., Makarova, J. & Makarov, V. A. New uses of LFPs: Pathway-specific threads obtained through spatial discrimination. *Neuroscience* **310**, 486–503 (2015).
78. Bell, A. J. & Sejnowski, T. J. An information-maximization approach to blind separation and blind deconvolution. *Neural Comput.* **7**, 1129–1159 (1995).
79. Chen, A. Fast Kernel Density Independent Component Analysis. in *Independent Component Analysis and Blind Signal Separation* 24–31 (Springer, Berlin, Heidelberg, 2006). doi:10.1007/11679363\_4
80. Korovaichuk, A., Makarova, J., Makarov, V. A., Benito, N. & Herreras, O. Minor contribution of principal excitatory pathways to hippocampal LFPs in the anesthetized rat: a combined independent component and current source density study. *J. Neurophysiol.* **104**, 484–497 (2010).
81. Makarova, J. *et al.* Can pathway-specific LFPs be obtained in cytoarchitecturally complex structures? *Front. Syst. Neurosci.* **8**, 66 (2014).
82. Aru, J. *et al.* Untangling cross-frequency coupling in neuroscience. *Curr. Opin. Neurobiol.* **31**, 51–61 (2015).
83. Nolte, G. *et al.* Robustly estimating the flow direction of information in complex physical systems. *Phys. Rev. Lett.* **100**, 234101 (2008).

## Supplementary Methods

### Animals and Surgery

Five male Long-Evans rats, with a weigh of 250-300 g. were trained in different behavioral tasks, with a multichannel electrode recording the electrophysiological activity in the hippocampus. All of them were implanted with a multisite silicon probe (Neuronexus Technologies, Michigan, USA) connected in turn to a jumper consisting of two corresponding connectors joined by 5 cm of flexible cable. An Ag/AgCl wire (World Precision Instruments, Florida, USA) electrode was placed in contact with the skin on the sides of the surgery area, and used as ground. We adjusted the final position of both electrodes using as a reference the typical evoked potentials at the dentate gyrus<sup>1</sup>, so that a maximal population spike in the dentate gyrus was recorded.

After the surgery, the rats were left for at least 10 days until they recovered completely. During the first 72 hours, they were injected subcutaneously with analgesic twice per day (Buprenorphine, dose 2-5 µg/kg, RB Pharmaceutical Ltd., Berkshire, UK). During 1 week, they had as well antibiotic dissolved in the water (Enrofloxacin, dose 10 mg/kg, Syva, León, Spain). The behavioral tasks were not started until the animals showed no signs of discomfort with the manipulation of the implants.

### Data acquisition and preprocessed

During each behavioral task, local field potentials (LFPs) from all sites were acquired simultaneously for each subject at 20 kHz. For LFP analysis, data were downsampled to 2500Hz and filtered with a high-pass filter (>0.5 Hz), and with a Notch filter at 50 Hz and 100 Hz to eliminate the net noise and its first harmonic. To increase the similarities between data sets of different subjects, they were normalized, imposing zero mean and variance one for each complete time series.

Each subject performed a novelty test, where they were habituated to an open field, with freedom of movement for 10 minutes every day for 8-10 days. The open field was a methacrylate sandbox of 50 x 50 cm, opened at the top and with three visual cues in three of the walls. The last session has been considered as the “control” situation. The “novelty” session was carried after the habituation, introducing the subject in a “novelty chamber”, inside the familiar open field for 10 minutes. This chamber was a methacrylate box of 35 x 35 cm, opened at the top and with a sand paper on the floor to incorporate a new tactile stimulus.

Four of the previous subjects carried out a memory task in a modified T-maze as has been described previously<sup>2</sup>. It consisted in several tracks in 8-like shape (132/102/80 cm long/wide/high with track wide 8 cm, Figure 6d). The starting point was located at the beginning of the center rail (Figure 6d, start) and the rat was forced to run across that arm (Figure 6d, center), blocking other pathways with black panels. At the end of the track, it must choose one of the two directions of the T-junction and a small drop of water was delivered at the corner (Figure 6d, reward) in successfully trials. Each repetition is considered successful if the rat chooses the opposite direction with respect to the previous trial, finding always a reward at the corner after the T-junction. Then, another panel located after the water prevented the rat from retracing its route, forcing it to go to the starting point across the corresponding side arm (Figure 6d, side), for a new trial. In some sessions, the rat was retained at this point with black panels for 10 seconds, forcing it to maintain in memory its last choice.

Each subject was trained by performing one session of 20 minutes per day before the surgery. The 10 seconds delay was introduced in half of the sessions, keeping the first 10 loops of all days without it. A total of 15 sessions in 23 days were carried out, reaching a successful performance greater than 80% in all subjects. After the surgery and recovery, 8 new sessions were performed, introducing the delay in the last four. Approximately, a total of 20 (40) trials with (without) delay were acquired during each session.

In this work, the electrophysiological recordings acquired in the T-maze were split into two groups of epochs as a function of the location during the task: at the center arm, before the T-junction, or at one side after the reward (Figure 6d, center and side, respectively).

### Current source density analysis of LFPs

The first approach to achieve the information of the sources contributing to the LFPs was the use of current source density<sup>3</sup> (CSD) analysis. This method reduces the volume conduction effects through the recording sites computing the second spatial derivative (Laplacian). In this way, it measures the transmembrane currents, providing a spatiotemporal distribution of the sinks and sources (inward and outward currents, respectively).

For probes with common separation between channels, we used the one-dimensional approach, which calculates the CSD from the voltage distribution of the adjacent sites:

$$CSD_m(t) = -\frac{\sigma}{h^2}(u_{m-1}(t) - 2u_m(t) + u_{m+1}(t)),$$

where  $u_m(t)$  is the LFP recorded at the  $m$ -th site,  $h$  is the distance between channels and  $\sigma$  is the conductivity of the extracellular space.

The CSD does not discriminate contributions from different pathways. To assess that question, an independent component analysis (ICA) should be performed.

### Independent Component Analysis of LFPs

To obtain the characteristic activity in each of the regions of interest from the LFP, we performed an ICA approach. This type of methodology aims to solve the problem of separating  $N$  statistically independent sources that have been mixed in  $N$  output channels. The approach performs a blind separation of patterns, because the different distributions of the sources are unknown. Moreover, it assumes spatial immobility of the sources or, in other terms, a fixed location of the axon terminals. The contribution of their synaptic currents to the LFP conforms the different ICs to unravel.

Its potential to find sources associated with known hippocampal pathways from LFPs records has been previously demonstrated and employed<sup>4-7</sup>. Each recorded time-series  $u_m(t)$  is modeled as the sum of  $N$  neuronal sources multiplied by a constant factor:

$$u_m(t) = \sum_{n=1}^N V_{mn} s_n(t), \quad m = 1, 2, \dots, M,$$

where  $V_{mn}$  is the mixing matrix with the voltage loadings of  $N$  LFP generators on  $M$  electrodes and  $s_n(t)$  is the time-series associated to the  $n$ -th LFP generator. Once the equation has been solved, virtual LFPs can be constructed for each IC, i.e. reproducing the LFPs signals that would be recorded if the only current source had been that specific generator.

There are several algorithms to compute the mixing matrix that transforms LFP data into ICs, nevertheless, all of them share a common theory framework. In this work, we have used the information-maximization approach RUNICA<sup>8</sup>, implemented in the matlab toolbox “ICAofLFPs” (<http://www.mat.ucm.es/~vmakarov/downloads.php>). For comparison purposes, the kernel density ICA algorithm KDICA<sup>9</sup> was also computed, obtaining similar results.

As the number of generators with significant variance and spatial distributions associated to different current sources<sup>10</sup> is relatively low (between 4 and 7 using electrodes with 32 channels), the ICA algorithm can be optimized by a dimension reduction using the principal component analysis. This method allows an improvement in the computational cost and reduces the number of noisy generators due to the presence of artifacts in the time-series<sup>6</sup>. Those components with explained variance <1% (respect to the original LFP variance) were considered as noise and rejected. The mathematical validation and practical limitations of ICA algorithms have been extensively investigated through realistic modelling<sup>11,12</sup>.

Thanks to the laminar structure of the hippocampus, with a separation of the neural terminations into different stratum, the ICA allows the isolation of determined postsynaptic activity from other currents. Thereby, it has been extracted two ICs in CA1, located in str. radiatum (Sch-IC) and str. lacunosum-moleculare (lm-IC), respectively, and another in the dentate gyrus, in the molecular layer (pp-IC). In the case of Sch-IC, the measured activity corresponds to the Schaffer collateral input from CA3 to the pyramidal cells in CA1, while the information in lm-IC is the input from entorhinal cortex layer III to the previous cells in CA1. Regarding the pp-IC, it contains the activity of the perforant pathway, the main input to the hippocampus from the layer II of the entorhinal cortex.

### Synchronization

For each theta cycle, a synchronization index (SI) was computed, which measured the variance of phase delay between IC-LFPs in one cycle with respect to the previous one. To do that and considering our IC-LFPs as  $x_k(t)$  (where  $k=1,2,3$ ), we have bandpass-filtered the signals at theta frequency (6-10 Hz) and extracted their phase using the Hilbert transform. We denominated  $\delta_{ij}(c)$  as the time delay from the  $c$  trough in  $x_i(t)$  to the closes trough of  $x_j(t)$ . Therefore, the SI from  $i$  to  $j$  can be computed by follows:

$$SI_{ij}(c) = -\frac{\Delta\delta_{ij}(c) - \delta_{max}}{\delta_{max}}$$

where

$$\Delta\delta_{ij}(c) = |\delta_{ij}(c) - \delta_{ij}(c - 1)|$$

The maximum time delay ( $\delta_{max}$ ) was settled so that at least 99% of the total cycles in every  $\Delta\delta_{ij}(c)$  have a lower value ( $\delta_{max}=21$  ms in our case).

To assess the synchronization between several oscillations at the same time, we considered the total delay difference as the summation of the delay differences between pairs:

$$\Delta\delta_i(c) = \sum_{m=1}^k |\delta_{im}(c) - \delta_{im}(c-1)|$$

To avoid desynchronized states due to a lack of theta oscillations, only those cycles with theta two times higher than delta power were taken into account.

### Cross-Frequency Coupling and directionality

To assess the cross-frequency coupling (CFC) between the phase and the amplitude, we have used the modulation index (MI), proposed by Tort and colleagues<sup>13</sup>, which is based on entropy measurements. Given two signals,  $x_\theta(t)$  and  $x_\gamma(t)$ , filtered at two frequencies, one slow and the other faster, we can extract the phase ( $x_{\theta\varphi}(t)$ ) and the amplitude ( $x_{\gamma A}(t)$ ), respectively, by the Hilbert transform. Next, each whole cycle in  $x_{\theta\varphi}(t)$  is divided in  $N$  bins of the same size, calling  $\langle x_{\gamma A} \rangle_\varphi(j)$  the mean amplitude value at the phase bin  $j$ . From them, we can calculate the entropy measure  $H$ , defined by:

$$H = - \sum_{j=1}^N p_j \log p_j \quad (12)$$

where  $N = 18$ , and  $p_j$  is given by

$$p_j = \frac{\langle x_{\gamma A} \rangle_\varphi(j)}{\sum_{j=1}^N \langle x_{\gamma A} \rangle_\varphi(j)} \quad (13)$$

The value of MI is obtained normalizing  $H$  by the maximum entropy ( $H_{max}$ ), given by the uniform distribution  $p_j = 1/N$  (i.e.  $H_{max} = \log N$ ):

$$MI = \frac{H_{max} - H}{H_{max}} \quad (14)$$

A value of MI near to 0 indicates lack of phase-to-amplitude modulation, while larger MI values show a high phase-to-amplitude modulation. The statistical significance has been assessed following the steps proposed by Canolty and colleagues<sup>14</sup>, by a surrogate analysis (n=100 surrogates) in which each surrogate is built by random shifts between the phase and the amplitude of both signals. The values of all series are approximated to a gaussian distribution, which mean value is considered as a significance threshold.

To cover all values represented in each comodulogram of MIs, we have varied both the values of the slow and fast frequencies. Each point of the x-axis has been filtered with a bandwidth of 2 Hz, and a step of 0.5 Hz, while for the y-axis, the bandwidth was fixed at 18 Hz, at least two times the frequency where the maximum theta value is expected<sup>15</sup>.

Although the MI is a measurement of the degree of interaction between the phase and the amplitude, the directionality of this coupling can be assessed. On the one hand, the theta phase would modulate the amplitude at gamma frequencies while, on the other hand, the gamma activity could be leading the phase. To identify who is the driver, we have used the cross-frequency directionality (CFD) index<sup>16</sup>. It is based on the phase-slope index<sup>17</sup>, a measurement of causality between time series. The main idea is that, if the oscillation of one signal at a certain frequency is driving another with a time delay, then the phase difference between them will change consistently with the frequency. The slope of the phase is obtained in function of the frequency, and its sign will indicate who is the driver. The CFD is a variant of the PSI, where one signal is the theta component, and the other the envelope of the gamma activity. Calling  $x(t)$  to the original signal,  $x_{\gamma A}^v(t)$  to the power envelope of the signal at a  $v$  gamma frequency, and being  $X$  and  $X_{\gamma A}^v$  their Fourier transform, respectively, the CFD is defined by:

$$\psi(v, f_j) = \text{Im} \left( \sum_{f_j - \frac{\beta}{2}}^{f_j + \frac{\beta}{2}} C^*(v, f_j) C(v, (f_j + \Delta f)) \right)$$

where

$$C(v, f_j) = \frac{\sum_{s=1}^S X^s (X_{\gamma A}^{v,s})^*}{\sqrt{\sum_{s=1}^S |X^s|^2 \sum_{s=1}^S |X_{\gamma A}^{v,s}|^2}}$$

is the complex coherency,  $f_j$  is the theta frequency under study,  $S$  is the number of segments in which the signal has been divided and  $\beta$  is the bandwidth for which the phase slope is measured, and it has been fixed at 2 Hz, 4 times the resolution ( $\Delta f = 0.5$  Hz).

To provide statistical significance, a new surrogate test ( $n=100$  surrogates) has been developed following the same steps than in the MI analysis. As the result of the CFD can be positive or negative, two thresholds have been established, as the average of the module of all surrogate results, and its inverse. To emphasize the directionality in the region of higher CFC, the MI comodulogram has been redefined as a mask, with values from 0 to 1 (minimum

and maximum value MI). Applying this mask to the CFD comodulogram, areas without phase-amplitude coupling will be attenuated, while the main cluster remains constant.



## Supplementary Bibliography

1. Andersen, P., Holmqvist, B. & Voorhoeve, P. E. Entorhinal activation of dentate granule cells. *Acta Physiol. Scand.* **66**, 448–460 (1966).
2. Wood, E. R., Dudchenko, P. A., Robitsek, R. J. & Eichenbaum, H. Hippocampal neurons encode information about different types of memory episodes occurring in the same location. *Neuron* **27**, 623–633 (2000).
3. Freeman, J. A. & Nicholson, C. Experimental optimization of current source-density technique for anuran cerebellum. *J. Neurophysiol.* **38**, 369–382 (1975).
4. Fernández-Ruiz, A., Makarov, V. A. & Herreras, O. Sustained increase of spontaneous input and spike transfer in the CA3-CA1 pathway following long-term potentiation in vivo. *Front. Neural Circuits* **6**, (2012).
5. Herreras, O., Makarova, J. & Makarov, V. A. New uses of LFPs: Pathway-specific threads obtained through spatial discrimination. *Neuroscience* **310**, 486–503 (2015).
6. Makarov, V. A., Makarova, J. & Herreras, O. Disentanglement of local field potential sources by independent component analysis. *J. Comput. Neurosci.* **29**, 445–457 (2010).
7. Schomburg, E. W. *et al.* Theta Phase Segregation of Input-Specific Gamma Patterns in Entorhinal-Hippocampal Networks. *Neuron* **84**, 470–485 (2014).
8. Bell, A. J. & Sejnowski, T. J. An information-maximization approach to blind separation and blind deconvolution. *Neural Comput.* **7**, 1129–1159 (1995).
9. Chen, A. Fast Kernel Density Independent Component Analysis. in *Independent Component Analysis and Blind Signal Separation* 24–31 (Springer, Berlin, Heidelberg, 2006). doi:10.1007/11679363\_4
10. Korovaichuk, A., Makarova, J., Makarov, V. A., Benito, N. & Herreras, O. Minor contribution of principal excitatory pathways to hippocampal LFPs in the anesthetized rat: a combined independent component and current source density study. *J. Neurophysiol.* **104**, 484–497 (2010).

11. Makarova, J., Ibarz, J. M., Makarov, V. A., Benito, N. & Herreras, O. Parallel readout of pathway-specific inputs to laminated brain structures. *Front. Syst. Neurosci.* **5**, 77 (2011).
12. Makarova, J. *et al.* Can pathway-specific LFPs be obtained in cytoarchitecturally complex structures? *Front. Syst. Neurosci.* **8**, 66 (2014).
13. Tort, A. B. L. *et al.* Dynamic cross-frequency couplings of local field potential oscillations in rat striatum and hippocampus during performance of a T-maze task. *Proc. Natl. Acad. Sci. U. S. A.* **105**, 20517–20522 (2008).
14. Canolty, R. T. *et al.* High Gamma Power Is Phase-Locked to Theta Oscillations in Human Neocortex. *Science* **313**, 1626–1628 (2006).
15. Aru, J. *et al.* Untangling cross-frequency coupling in neuroscience. *Curr. Opin. Neurobiol.* **31**, 51–61 (2015).
16. Jiang, H., Bahramisharif, A., van Gerven, M. A. J. & Jensen, O. Measuring directionality between neuronal oscillations of different frequencies. *NeuroImage* **118**, 359–367 (2015).
17. Nolte, G. *et al.* Robustly estimating the flow direction of information in complex physical systems. *Phys. Rev. Lett.* **100**, 234101 (2008).

## Supplementary Figures

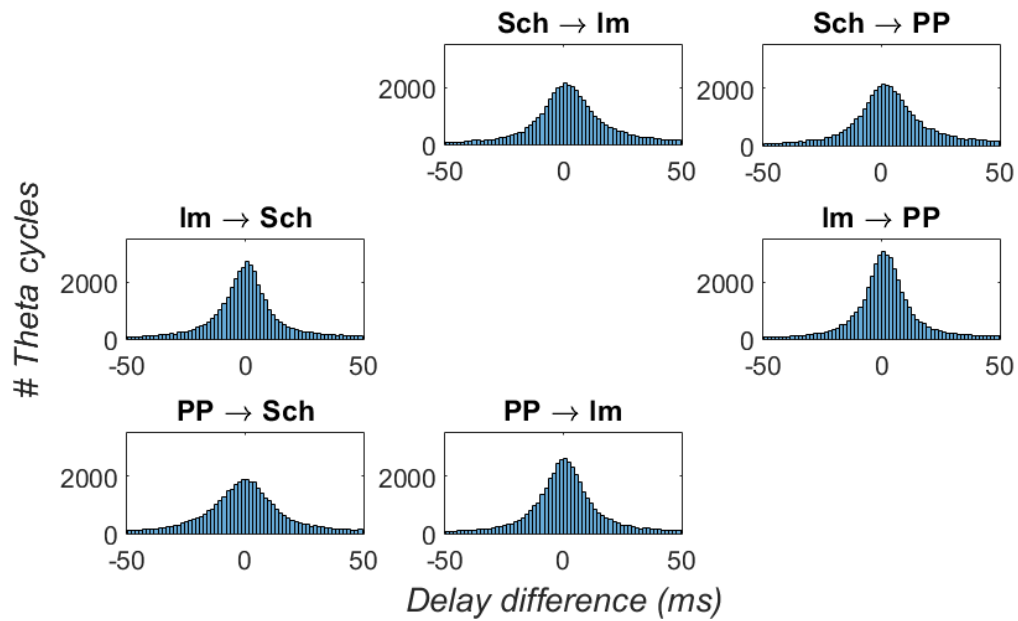

**Figure S1:** Phase difference distribution, computed as the time delay between IC-LFPs theta troughs in one cycle minus the delay in the previous one. In all cases, it presents a Gaussian distribution centred in zero.

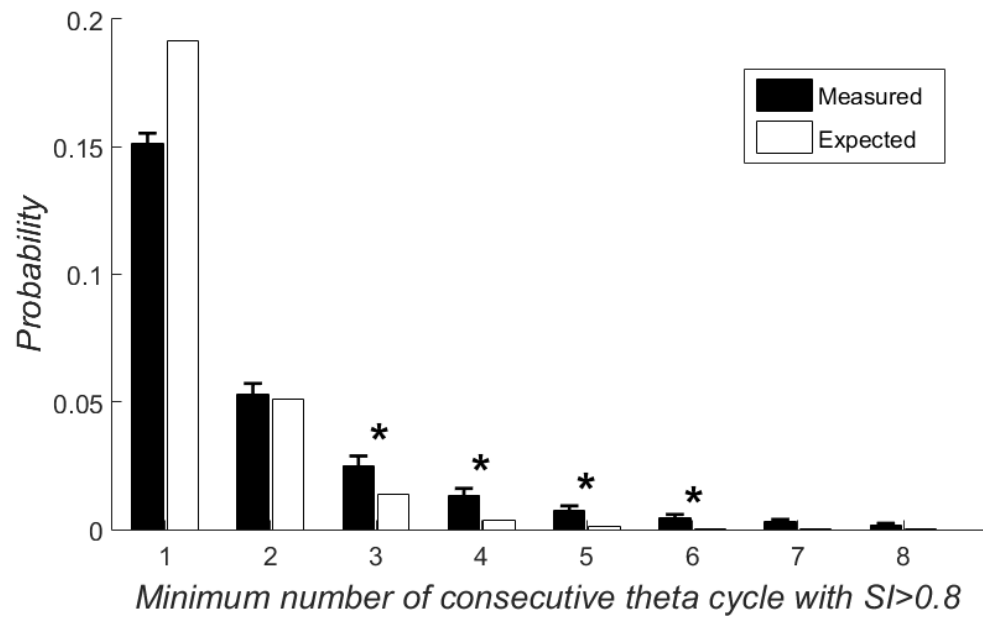

**Figure S2:** High synchronization epochs preferentially last three consecutive theta cycles. Each pair of bars compares the probability (mean  $\pm$  s.e.m) of, given a theta cycle with SI>0.8, find at least a certain number of consecutive cycles with strong synchronization (SI>0.8), and the probability expected by chance. The minimum number of cycles with a significant difference between measured and expected measurements is three theta cycles ( $p<0.001$ , t-test), and goes on until six cycles ( $p<0.01/0.05/0.05$ , respectively, t-test).

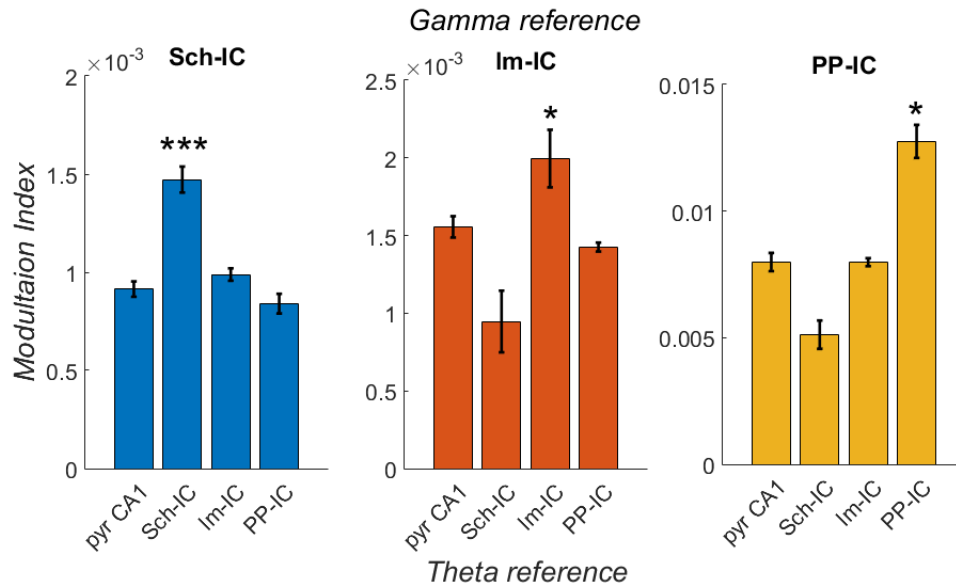

**Figure S3:** Maximum theta-gamma CFC corresponds to oscillations recorded in the same IC-LFP, higher than any between-layer combination. Left/middle/right panel represents the MI (mean  $\pm$  s.e.m.) between slow/medium/fast gamma recorded from Sch-IC/Im-IC/PP-IC, and the theta phase of all IC-LFPs and the LFP from pyrCA1. Significant stronger MI values were found in all cases when both theta and gamma have the same origin (\*/\*\*\*)  $p < 0.05/0.001$ , one-way ANOVA, followed by Bonferroni correction). Moreover, there is a trend when Im-IC and PP-IC gamma modulation, with higher values when the coupling is measured using a theta oscillation from a common origin in entorhinal cortex (PP-IC and Im-IC, respectively), compared to the theta rhythm of Sch-IC, generated in CA3.

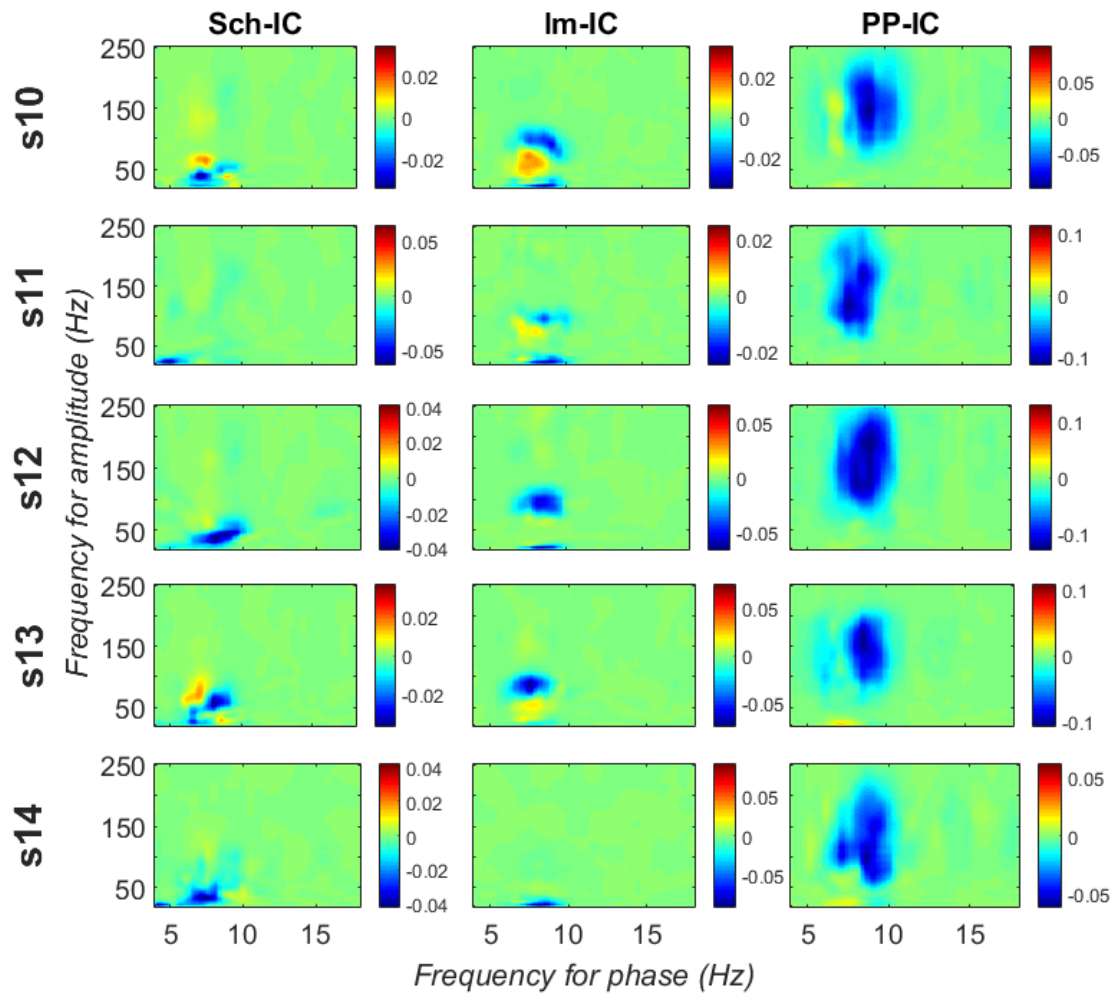

**Figure S4:** CFD for individual animals measured along all the recording time. Significant negative values (gamma amplitude drives theta phase) were found in 4 of 5 subjects in Sch-IC and Im-IC for those pair of frequencies with maximum CFC ( $37.5 \pm 5$  Hz in Sch-IC and  $82.5 \pm 4$  Hz in Im-IC), while negative CFDs were significant in PP-IC for all subjects.
